# Supplementary material for: Unveiling the Immunogenicity of Ovarian Tumors as the Crucial Catalyst for Therapeutic Success
Source: MDPI journal article supplement (doi:10.3390/cancers15235694), 2023-12-02
Supplement: s1 [file s1]

**Supplementary Table S1: Current clinical trials addressing some components affecting EOC immunogenicity**

| Clinical trial ID | Phase | Line                      | Treatment                                                                                           | Diseases treated                                                                                      | References            |
|-------------------|-------|---------------------------|-----------------------------------------------------------------------------------------------------|-------------------------------------------------------------------------------------------------------|-----------------------|
| NCT01112293       | II    | Relapsed                  | Anti-TGF Monoclonal Antibody (GC1008)                                                               | Pleural Malignant Mesothelioma                                                                        | [222]                 |
| NCT04935359       | III   | First line                | NIS793 in Combination with Gemcitabine and Nab-paclitaxel                                           | Metastatic PDAC                                                                                       | [223]                 |
| NCT05145569       | I     | Metastatic                | Neoadjuvant Chemotherapy (Carboplatin AUC 5 and paclitaxel) With or Without BINTRAFUSP ALFA (M7824) | Metastatic Advanced OC                                                                                | NA                    |
| NCT02538471       | II    | Metastatic                | LY2157299 Monohydrate (LY2157299) and Radiotherapy                                                  | Metastatic Breast Cancer                                                                              | [224]                 |
| NCT04429542       | I     | First line                | Bifunctional EGFR/TGF $\beta$ Fusion Protein BCA101 Monotherapy and in Combination Therapy          | EGFR-Driven Advanced Solid Tumors (HNSCC, SCCL, cSCC, SCC EOC, PC)                                    | [200,225]             |
| NCT00063401       | II    | First line                | Cetuximab (C225)/Paclitaxel/Carboplatin                                                             | Advanced Stage Ovarian, Primary Peritoneal, and Fallopian Tube Cancer                                 | NA                    |
| NCT02954523       | I/II  | First line                | Dasatinib and Osimertinib (AZD9291)                                                                 | Advanced NSCLC With EGFR Mutations                                                                    | [201]                 |
| NCT04511871       | I     | Relapsed/refractory       | CAR modified autologous T cells (CCT303-406)                                                        | HER2 Positive Solid Tumors                                                                            | Study still enrolling |
| NCT04562298       | I     | Relapsed/refractory       | CAR-T cell therapy (LCAR-M23) targeting MSLN                                                        | EOC                                                                                                   | NA                    |
| NCT02580747       | I     | Relapsed/Chemo refractory | Patient autologous or donor-derived T cells transduced with the anti-meso vector (CART-meso cells)  | Advanced Malignancies: malignant mesothelioma, OC, PC, TNBC, EC, and other mesothelin positive tumors | NA                    |
| NCT01583686       | I/II  | Metastatic                | Lymphodepleting conditioning followed by infusion of anti-mesothelin gene engineered T lymphocytes  | Metastatic or unresectable cancer expressing mesothelin                                               | NA                    |
| NCT05211557       | I     | Relapsed                  | Fully Human B7H3 (CD276) CAR-T cells                                                                | Recurrent Malignant OC                                                                                | Study still enrolling |
| NCT05472857       | I     | Advanced                  | CLDN18.2-targeting CAR T Cells                                                                      | Solid tumors with positive CLDN18.2 expression (GC, PC, OC, gastroesophageal junction adenocarcinoma) | Study still enrolling |
| NCT05225363       | I     | Platinum resistant        | TAG72-CAR T Cells                                                                                   | Platinum Resistant EOC                                                                                | Study still enrolling |

|                    |      |                               |                                                                                                                                               |                                                                                                                     |                       |
|--------------------|------|-------------------------------|-----------------------------------------------------------------------------------------------------------------------------------------------|---------------------------------------------------------------------------------------------------------------------|-----------------------|
| <b>NCT05613088</b> | II   | Platinum resistant            | Farletuzumab ecteribulin (MORAb-202, Folate Receptor Alpha-targeting Antibody-drug Conjugate) compared to investigator choice of chemotherapy | HGSC, primary peritoneal, or fallopian tube cancer                                                                  | Study still enrolling |
| <b>NCT04300556</b> | I/II | Platinum resistant            | Farletuzumab Ecteribulin                                                                                                                      | OC, endometrial cancer, NSCLC, TNBC                                                                                 | Study still enrolling |
| <b>NCT02671435</b> | I/II | Metastatic                    | Durvalumab (MEDI4736) and Monalizumab                                                                                                         | Advanced solid tumors                                                                                               | NA                    |
| <b>NCT05769959</b> | I/II | Metastatic                    | Study of RO7515629                                                                                                                            | Advanced or metastatic solid tumors expressing HLA-G (RCC, NSCLC, pancreatic adenocarcinoma, CC, ovarian neoplasms) | Study still enrolling |
| <b>NCT00529022</b> | I    | Platinum resistant            | Azacitidine and Valproic Acid Plus Carboplatin                                                                                                | Platinum Resistant EOC                                                                                              | NA                    |
| <b>NCT02900560</b> | II   | Platinum resistant/refractory | Pembrolizumab With or Without oral azacitidine (CC-486)                                                                                       | EOC                                                                                                                 | NA                    |

**Abbreviations:** Pancreatic ductal adenocarcinoma [PDAC], ovarian cancer [OC], epithelial ovarian cancer [EOC], head and neck squamous cell carcinoma [HNSCC], squamous cell carcinoma of the lung [SCCL], cutaneous squamous cell carcinoma [cSCC], squamous cell carcinoma [SCC], pancreatic cancer [PC], endometrial cancer [EC], high-grade serous ovarian cancer [HGSC], non-small cell lung carcinoma [NSCLC], gastric cancer [GC], triple-negative breast cancer [TNBC]), renal adenocarcinoma [RCC], colorectal cancer [CC], NA: No publications available.

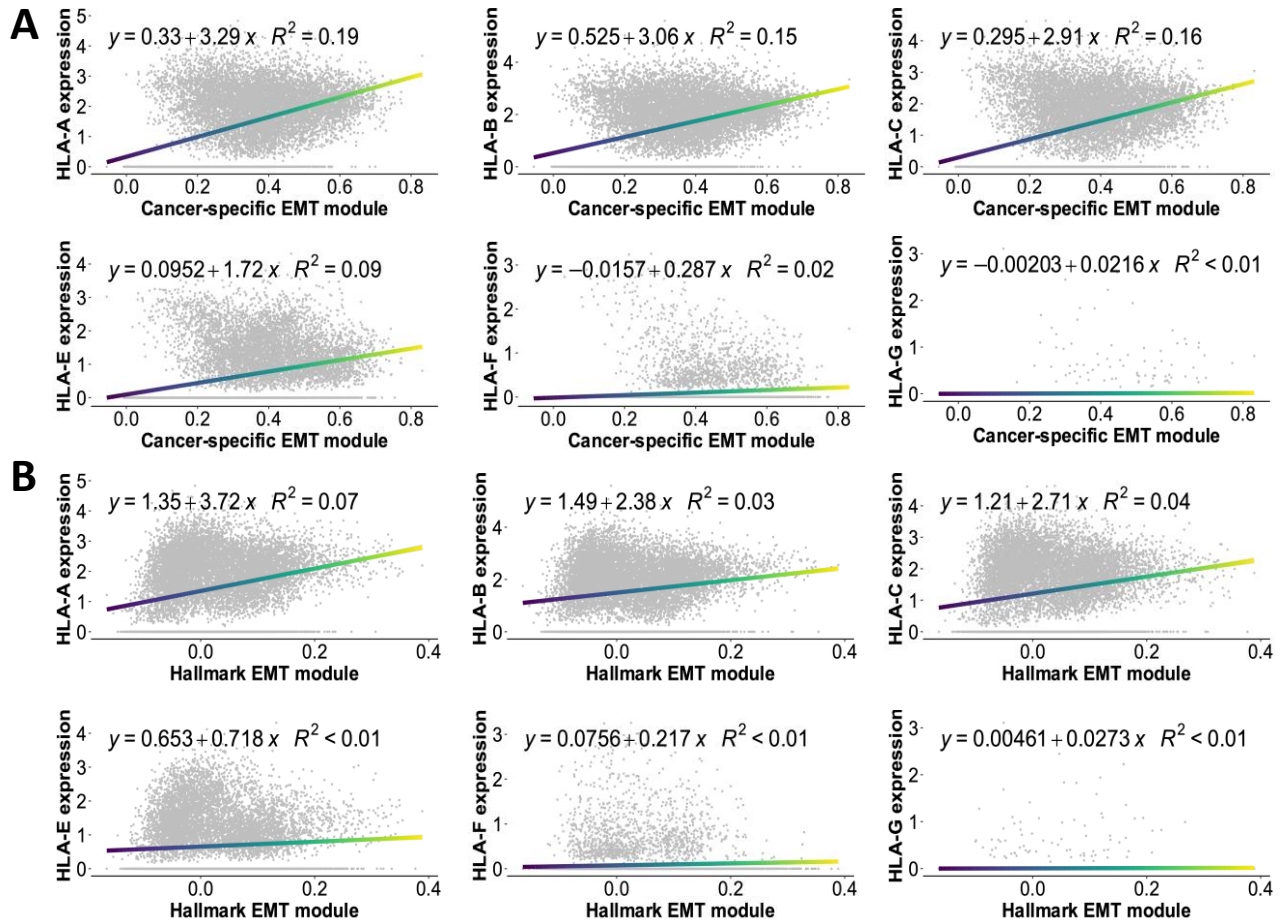

**Supplementary Figure S1. Average gene expression of HLA I allotypes increases in correlation with the average EMT gene expression in ovarian cancer cells. Gene expression of HLA I allotypes in ovarian cancer cells.**
